# Supplementary material
Source: PubMed Central journal article supplement (PMC5291737)
Supplement: jciinsight-2-87499-s001.pdf [file jciinsight-2-87499-s001.pdf]

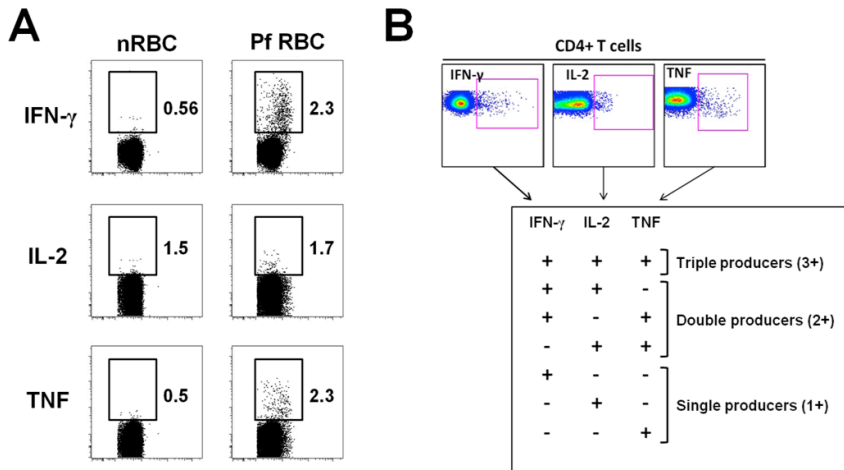

**Supplemental Figure 1. Identification of single, double and triple cytokine**

**producing CD4<sup>+</sup> T cells.** (A) Representative staining for IFN- $\gamma$ , IL-2 and TNF

production by CD4<sup>+</sup> T cells measured by flow cytometry and intracellular cytokine staining from whole blood samples stimulated with uninfected red blood cell extract (nRBC) or *P. falciparum* infected red blood cell extract (Pf RBC).

(B) Boolean gating strategy to identify single, double and triple cytokine producing CD4<sup>+</sup> T cells using FlowJo.

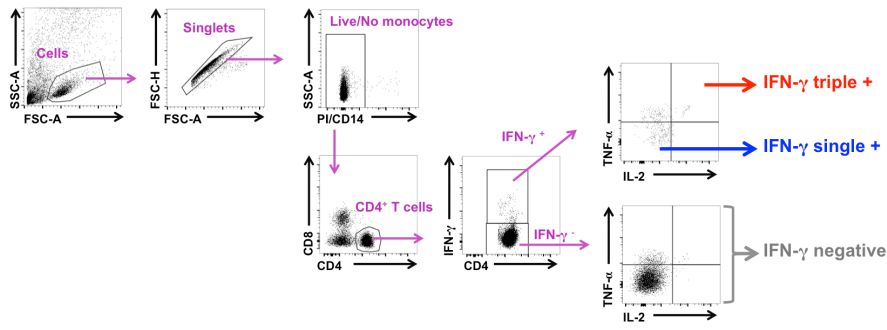

**Supplemental Figure 2. Gating strategy to identify and sort viable IFN- $\gamma$  negative, IFN- $\gamma$  single positive and IFN- $\gamma$ /IL-2/TNF triple positive CD4<sup>+</sup> T cells.** Whole blood was collected four weeks post-infection with *P. falciparum*, *in vitro* stimulated with *Pf* pRBC parasite antigen extract overnight, and *P. falciparum*-reactive cytokine producing CD4<sup>+</sup> T cells sorted using the three-color polyfunctional cytokine secretion assay. Cytokine producing CD4<sup>+</sup> T cells were gated as PI/CD14/CD8/ CD4<sup>+</sup> cells. Plots show representative staining of one volunteer.

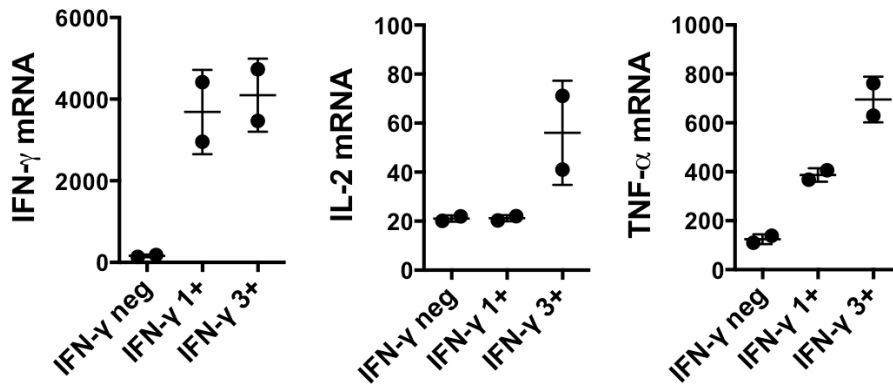

**Supplemental Figure 3. Expression of IFN- $\gamma$ , IL-2 and TNF cytokines in IFN- $\gamma$  negative, IFN- $\gamma$  single positive and IFN- $\gamma$ /IL-2/TNF triple positive CD4<sup>+</sup> T cells determined by microarray analysis.** Whole blood was collected four weeks post-infection with *P. falciparum*, *in vitro* stimulated with parasite antigen extract overnight, and *P. falciparum*-reactive cytokine producing CD4<sup>+</sup> T cells sorted using the three-color polyfunctional cytokine secretion assay. Cytokine expression was determined with an Affymetrix Human Gene ST 2.0 gene array from mRNA pools from sorted cells subsets of four independent volunteers per array. Data derived from two independent microarray experiments, with four independent volunteers per experiment.

**Supplemental Table 1. Genes differentially expressed between *P. falciparum*-reactive IFN- $\gamma$  single positive and IFN- $\gamma$ /IL-2/TNF triple positive CD4<sup>+</sup> T cells**

| Gene Symbol  | Transcript cluster ID | Fold-change <sup>A</sup><br>Exp #1 | Fold-change <sup>A</sup><br>Exp #2 | Gene Symbol   | Transcript cluster ID | Fold-change <sup>A</sup><br>Exp #1 | Fold-change <sup>A</sup><br>Exp #2 |
|--------------|-----------------------|------------------------------------|------------------------------------|---------------|-----------------------|------------------------------------|------------------------------------|
| AQP9         | 16801473              | 3.37                               | 4.25                               | IRAK3         | 16753670              | 2.30                               | 2.73                               |
| C5AR1        | 16863589              | 8.26                               | 2.50                               | ITGAX         | 16818272              | 2.15                               | 2.33                               |
| CCL3L3L1     | 16843627              | 5.70                               | 3.75                               | KCTD12        | 16779839              | 2.20                               | 2.46                               |
| CCL8         | 16833224              | 2.02                               | 2.68                               | KIAA1199      | 16803754              | 4.65                               | 2.10                               |
| CD163        | 16760792              | 5.30                               | 3.51                               | LILRA1        | 16865383              | 2.40                               | 3.10                               |
| CTSL1        | 17086540              | 3.80                               | 2.63                               | LYZ           | 16767364              | 3.48                               | 2.20                               |
| CXCL16       | 16840113              | 4.00                               | 2.02                               | MS4A7         | 16725210              | 3.49                               | 3.15                               |
| CXCL5        | 16976827              | 7.49                               | 3.82                               | MT1G          | 16826738              | 16.49                              | 3.94                               |
| CXCR3        | 17111955              | 2.06                               | 3.69                               | MT1H          | 16819257              | 12.75                              | 2.78                               |
| CYBB         | 17102538              | 3.36                               | 2.11                               | MT1M          | 16819224              | 3.42                               | 4.62                               |
| DMXL2        | 16809263              | 3.82                               | 2.69                               | PLA2G7        | 17019728              | 4.67                               | 2.47                               |
| ETS2         | 16922779              | 2.15                               | 2.30                               | PLAUR         | 16873060              | 2.98                               | 2.27                               |
| FPR1         | 16874945              | 9.69                               | 3.78                               | PMS2          | 17054923              | 2.20                               | 2.11                               |
| GNPNAT1      | 16784275              | 2.27                               | 2.36                               | POLR2J        | 17060983              | 2.35                               | 3.04                               |
| HMGAI        | 17117871              | 3.09                               | 2.35                               | PTGS2         | 16697370              | 3.32                               | 4.25                               |
| HMOX1        | 16929562              | 2.63                               | 3.23                               | RN5S123       | 16950838              | 7.65                               | 2.64                               |
| IGHM         | 16789782              | 8.44                               | 4.76                               | RN5S450       | 16850954              | 2.89                               | 2.16                               |
| IGHV4-31     | 16797512              | 2.36                               | 2.75                               | RNF185        | 16934039              | 3.61                               | 5.34                               |
| IGHV4-34     | 16797520              | 15.25                              | 7.72                               | S100A9        | 16671139              | 4.78                               | 3.27                               |
| IGKC         | 16900090              | 8.12                               | 2.02                               | S1PR1         | 16667760              | 2.01                               | 3.98                               |
| IGKV1-16     | 16900132              | 8.78                               | 3.12                               | SERPINB2IB10  | 16852871              | 3.53                               | 4.25                               |
| IGLC2        | 16927853              | 3.47                               | 7.29                               | TLR2          | 16971631              | 2.05                               | 2.12                               |
| IGLJ7/IIGLC7 | 16927869              | 2.26                               | 2.48                               | TRAJ17/ITRAV3 | 16781830              | 3.58                               | 2.02                               |
| IGLV1-44     | 16927858              | 11.84                              | 13.29                              | TRAJ36        | 16782052              | 4.08                               | 2.39                               |
| IGSF6        | 16824907              | 2.36                               | 2.15                               | TRAJ42        | 16782040              | 2.67                               | 2.81                               |
| IL1B         | 16901986              | 3.84                               | 3.15                               | TRAJ54        | 16782018              | 2.03                               | 5.08                               |
| IL2          | 16979570              | 3.22                               | 2.02                               | TRAJ9         | 16782104              | 2.18                               | 3.86                               |
| IL3          | 16988964              | 3.19                               | 5.56                               | TRAV20        | 16781916              | 2.97                               | 3.85                               |
| IL3RA        | 17101111              | 2.07                               | 2.16                               | TRAV25        | 16781937              | 3.03                               | 6.01                               |
| IL6          | 17044177              | 4.02                               | 2.43                               | TRAV4         | 16781834              | 2.40                               | 2.14                               |
| IL8          | 16967771              | 2.90                               | 2.21                               |               |                       |                                    |                                    |

<sup>A</sup> determined using Affymetrix Human Gene ST 2.0 array of pooled RNA samples from 4 independent volunteers

**Supplemental Table 2. Antibodies used for flow cytometry**

| <b>Antigen</b> | <b>Fluorochrome</b> | <b>Clone</b> | <b>Company</b>   | <b>Catalog number</b> |
|----------------|---------------------|--------------|------------------|-----------------------|
| CD4            | APC                 | SK3          | Becton Dickinson | 340672                |
| CD4            | V500                | RPA-T4       | Becton Dickinson | 560768                |
| CD4            | BV510               | OKT4         | Biologend        | 317443                |
| CD8            | APC-H7              | SK1          | Becton Dickinson | 560179                |
| CD14           | PE Texas Red        | RMO52        | Beckman Coulter  | IM0650U               |
| KLRG1          | PE                  | 2F1/KLRG1    | Biologend        | 138407                |
| IFN- $\gamma$  | FITC                | B27          | Becton Dickinson | 554700                |
| IL-2           | AF700               | MQ1-17H12    | Biologend        | 500319                |
| TNF- $\alpha$  | PE-Cy7              | MAb11        | Becton Dickinson | 557647                |

**Supplemental Table 3. Forward and reverse primers sequences of the genes selected for validation by RT-qPCR**

| <b>Gene Symbol</b> | <b>Forward Primer</b> | <b>Reverse Primer</b> |
|--------------------|-----------------------|-----------------------|
| AQP9               | TTGATTGTCCTTGGATGTGG  | GGTTGATGTGACCACCAGAG  |
| C5AR1              | GCTTCCTGTGGCCTCTACTC  | CACCACCTTGAGTGTCTTGG  |
| CCL3L3IL1          | CTCTGCAACCAGGTCCTCTC  | TTTCTGGACCCACTCCTCAC  |
| CCL8               | GACTTGCTCAGCCAGATTCA  | AAGATCACAGCTTCCTTGGG  |
| CD163              | TTCAGTGCAGTGGGACTGAG  | CACTCTCTATGCAGGCCACA  |
| CTSL1              | AGGGAAGGGAAACACAGCTT  | AAGCCCAACAAGAACCACAC  |
| CXCL16             | ATGCTTACTCGGGGATTGTG  | GTGGTTTCATTGGGACGAGT  |
| CXCL5              | TTTGGACGGTGGAAACAAG   | TCTCTGCTGAAGACTGGGAA  |
| CXCR3              | ACACCTTCCTGCTCCACCTA  | GTTTCAGGTAGCGGTCAAAGC |
| ETS2               | AGAGGAGTGACCCAGTGGAG  | TGATGAATGACTGGCAGGAT  |
| FPR1               | CCAGGAGACCCAGACCTAGA  | TGTCTGCTCCTGGACTGTTC  |
| HMGA1              | CATCCTCATTGCCTCCTGTT  | GTGGCCCCTACACCCTTTAT  |
| HMOX1              | AGTGCCACCAAGTTCAAGC   | CAAAGAGCTGGATGTTGAGC  |
| IGSF6              | AGTGTACCTTCTCCGCAACC  | GCCTCCCTCACTGTGAACTT  |
| IL1B               | CAGATGAAGTGCTCCTTCCA  | ACCAGCATCTTCCTCAGCTT  |
| IL2                | TCACCAGGATGCTCACATTT  | TGCTGATTAAGTCCCTGGGT  |
| IL3                | TTTGCTGGACTTCAACAACC  | CTTGACAGCCCTGTTGAATG  |
| IL3RA              | CCCAACATGACTGCAAAGTG  | TCTTTCCCGGGCTCTTATTT  |
| IL6                | AATGAGGAGACTTGCCTGGT  | GCAGGAACTGGATCAGGACT  |
| IL8                | AGGACAAGAGCCAGGAAGAA  | ACTGCACCTTCACACAGAGC  |
| IRAK3              | TTGCAGTGTGTAGGTGACACG | GAGCATGGTTGAACGTTGTG  |
| ITGAX              | CCTGTTACAGCCTTAGCAA   | CATACTGGACCACGCTGTCT  |
| LILRA1             | GACCCAGGAGTACCGTCTGT  | ACTGGCCCTTCTTCACAATC  |
| LYZ                | GGAGCAGTTAATGCCTGTCA  | GATCACGGACAACCCTCTTT  |
| MS4A7              | GATCATCACCCCTGCACTTT  | TTAAACTGCAGCCCACTGG   |
| MT1G               | ACCTCCTGCAAGAAGAGCTG  | GGAATGTAGCAAAGGGGTCA  |

|                    |                       |                      |
|--------------------|-----------------------|----------------------|
| MT1H               | ACGTGTTCCACTGCCTCTTC  | AGGAGCAGCAGCTCTTCTTG |
| MT1M               | AGCAGTCGCTCCATTTATCG  | AGGAGCAGCAGCTCTTCTTG |
| PLA2G7             | GGTACGGCAAAGAGCAAAAG  | CGTTGCTCCACCAAAGAAT  |
| PLAUR              | GCCTTACCGAGGTTGTGTGT  | CATCCAGGCACTGTTCTTCA |
| PTGS2              | GCTGGAACATGGAATTACCC  | TGATTCATAGGGCTTCAGCA |
| S100A9             | GGACACAAATGCAGACAAGC  | TCTTGGCCACTGTGGTCTTA |
| S1PR1              | GACTCTGCTGGCAAATTCAA  | GAGGAATTGTCCGATTTGCT |
| SERPIN2            | GTTCATGCAGCAGATCCAGA  | CGCAGACTTCTCACCAAACA |
| SERPIN10           | GAAAGACAGACCGAGGGTAAA | ATAGGGCGTTCACCAGAATC |
| TLR2               | GGAGTTCTCCAGTGTTTGG   | CCCACAGGTACCTTCACTTG |
| TNF                | CCCATGTTGTAGCAAACCCT  | TGAGGTACAGGCCCTCTGAT |
| Housekeeping genes |                       |                      |
| ACTB               | TGGACTTCGAGCAAGAGATG  | GAAGGAAGGCTGGAAGAGTG |
| B2M                | TGTCTTTCAGCAAGGACTGG  | GCATCTTCAAACCTCCATGA |
| GAPDH              | CATCAATGGAAATCCCATCA  | GACTCCACGACGTACTCAGC |
| HPRT1              | CTGGCGTCGTGATTAGTGAT  | GAGCACACAGAGGGCTACAA |
